# Supplementary material for: The impact of senescence on muscle wasting in chronic kidney disease
Source: PubMed Central journal article supplement — J Cachexia Sarcopenia Muscle. 2022 Nov 9;14(1):126–41. doi: 10.1002/jcsm.13112 (PMC9891952; doi:10.1002/jcsm.13112), 2022-11-09
Supplement: JCSM-14-126-s001.pdf [file JCSM-14-126-s001.pdf]

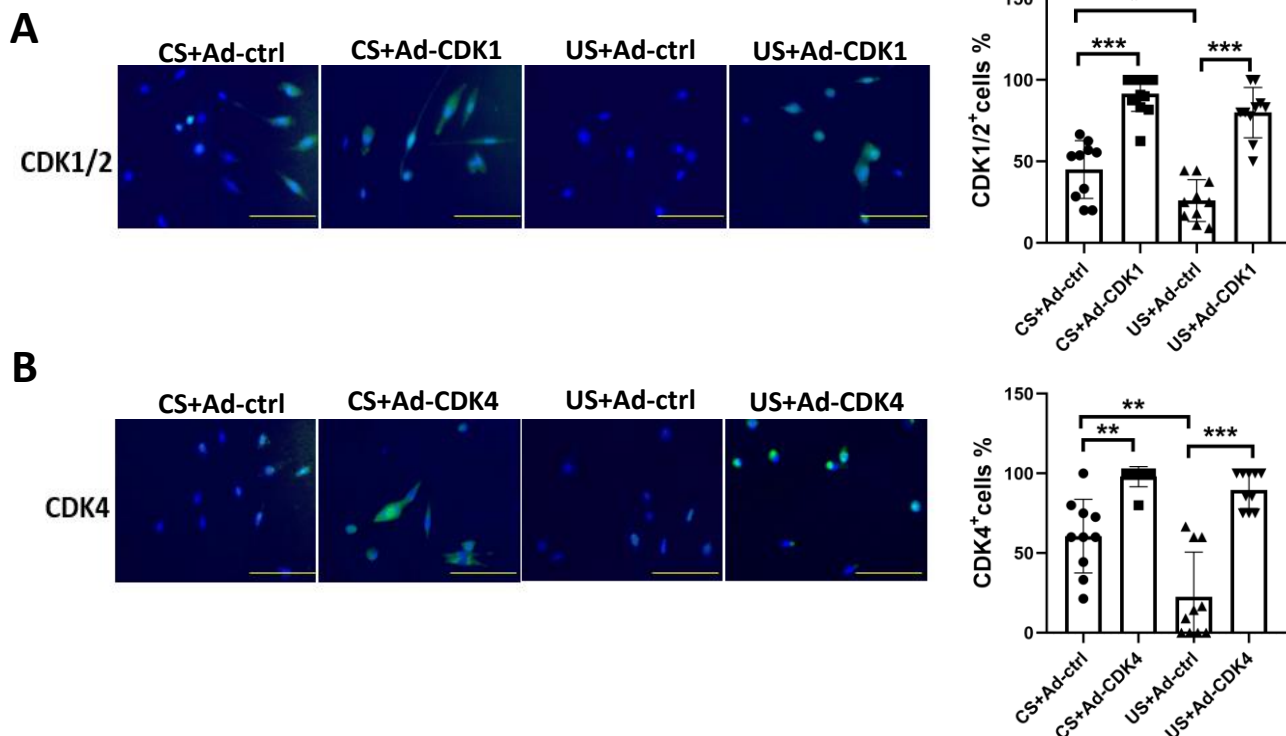

**Supplementary Figure 1. Uremic serum (US) decreased the amount of cyclin-dependent kinase (CDK).**

MPCs were transduced with Ad-ctrl, Ad-CDK1 (A) or Ad-CDK4 (B) and treated with either control (CS) or uremic serum (US) for 48 hours. Immunofluorescence staining showed that CDK1/2<sup>+</sup> and CDK4<sup>+</sup> cells were increased after adenovirus transduction. DAPI staining was used to determine the number of nuclei (total cell population). The percent of CDK1<sup>+</sup> (A) or CDK4<sup>+</sup> (B) cells in total cell population were calculated and summarized in bar/point graph. (Bars: mean  $\pm$  s.e.; scale bar = 50 $\mu$ m; n = 6/group; \* = p<0.05; \*\* = p<0.01; \*\*\* = p<0.001).

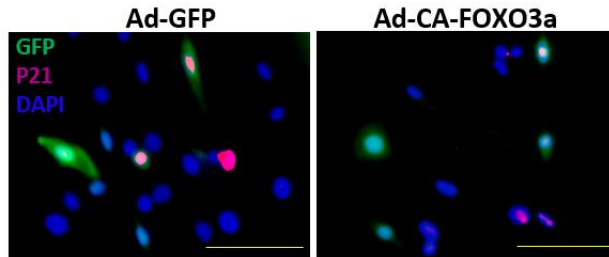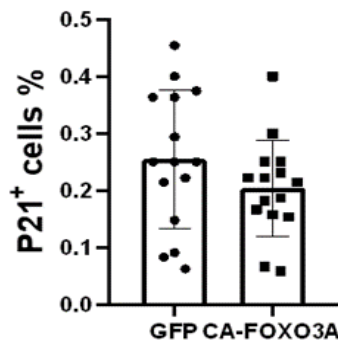

**Supplementary Figure 2. p21 was not regulated by FOXO3a in MPCs.**

MPCs were transduced with constitutive activation Ad-(CA)-FOXO3a-GFP or Ad-GFP adenovirus for control. **(A)** The shape of adenovirus transduced MPCs were shown (scale bar = 100 $\mu$ m). **(B)** p21 positive cells were measured by immunofluorescence. The percent of p21 positive cells (red) in total cell population were calculated and summarized in bar/point graph. (Bars: mean  $\pm$  s.e.; scale bar = 50 $\mu$ m; n = 6/group).

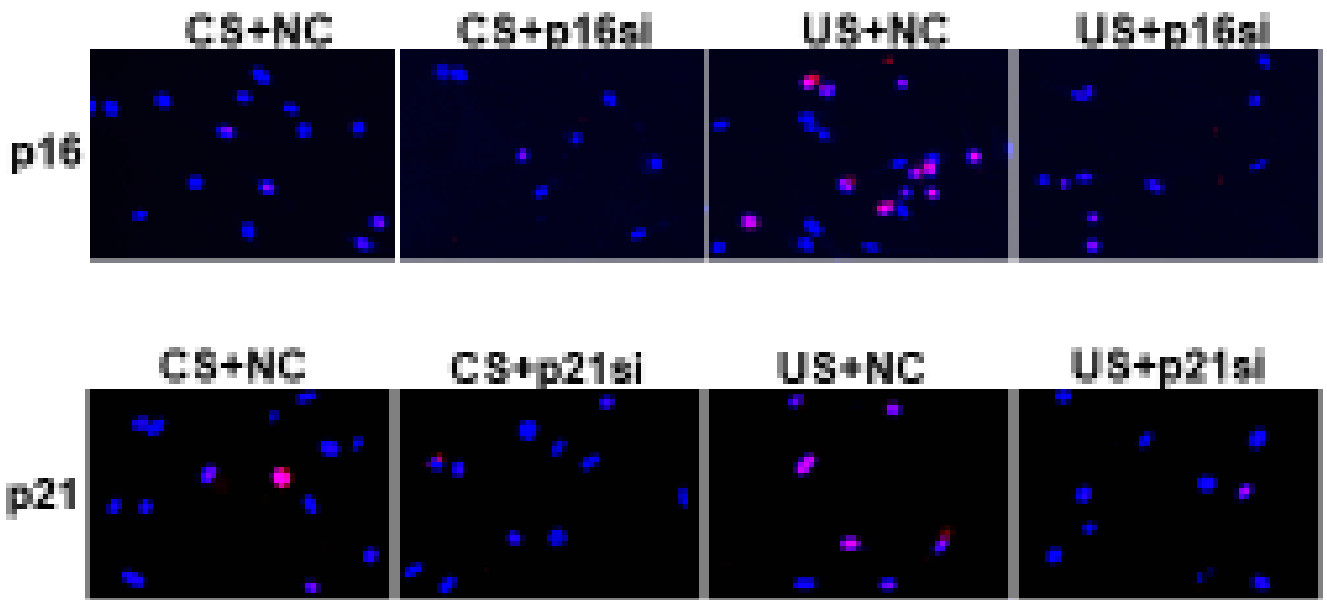

**Supplementary Figure 3. confirmation of knockdown by the siRNAs in uremic serum treated MPCs**

MPCs were treated in 2% control or uremic serum for 48 hours. The siRNA of control (NC), p16 (p16si) or p21 (p21si) were transfected into the cells. Immunofluorescence staining showed that p16 and p21 positive cells were decreased in uremic treated group. DAPI staining was used to determine the number of nuclei (total cell population).

Supplementary Table 1-A

| <u>ID</u> | <u>Age</u> | <u>Gender</u> | <u>Race</u> | <u>Weight (kg)</u> | <u>BMI</u> | <u>Smoking</u> | <u>Veteran</u> | <u>CKD stage</u> | <u>CKD Etiology</u>          | <u>Hypertension</u> | <u>Diabetes</u> | <u>Family Hx of HTN</u> |
|-----------|------------|---------------|-------------|--------------------|------------|----------------|----------------|------------------|------------------------------|---------------------|-----------------|-------------------------|
| CKD_001   | 61         | 1             | 1           | 95.3               | 31         | 1              | 1              | 4                | unspecified                  | 1                   | 0               | 1                       |
| CKD_002   | 61         | 1             | 0           | 91.4               | 30.6       | 2              | 0              | 4                | kidney stones                | 1                   | 1               | unknown                 |
| CKD_003   | 70         | 1             | 0           | 89                 | 28.2       | 2              | 1              | 4                | Pt. says he has plaque build | 1                   | 0               | 1                       |
| CKD_004   | 55         | 1             | 1           | 95.2               | 31.1       | 2              | 0              | 4                | diabetes                     | 1                   | 1               | 1                       |
| CKD_005   | 70         | 1             | 1           | 66.3               | 23.5       | 2              | 1              | 4                | HTN                          | 1                   | 1               | 1                       |
|           |            |               |             |                    |            |                |                |                  |                              |                     |                 |                         |
| CON_001   | 55         | 1             | 1           | 77.4               | 25.9       | 1              | 1              | N/A              | N/A                          | unspecified         | unspecifie      | 1                       |
| CON_002   | 59         | 1             | 1           | 101.2              | 34.2       | 1              | 1              | N/A              | N/A                          | 1                   | 0               | 1                       |
| CON_003   | 62         | 1             | 1           | 95                 | 30         | 0              | 1              | N/A              | N/A                          | 1                   | 0               | 1                       |
| CON_004   | 66         | 1             | 1           | 65.1               | 21.2       | 0              | 1              | N/A              | N/A                          | 1                   | 0               | 1                       |
| CON_005   | 57         | 1             | 1           | 68.4               | 22.9       | 0              | 1              | N/A              | N/A                          | 0                   | 0               | 0                       |

Supplementary Table 1-B

| <u>CAD</u> | <u>PTSD</u> | <u>Beta Blockers</u> | <u>ACE/ARB</u> | <u>DCCB</u> | <u>NDCCB</u> | <u>Diuretics</u> | <u>PDE</u>          | <u>Alpha blocker</u> | <u>Hydralazine</u> | <u>Statin</u> | <u>Sodium Bicarb</u> |
|------------|-------------|----------------------|----------------|-------------|--------------|------------------|---------------------|----------------------|--------------------|---------------|----------------------|
| 0          | 1           | carvedilol           | 0              | Amlodipin   | 0            | 0                | sildenafil          | 0                    | 1                  | 0             | 650mg                |
| 1          | 0           | carvedilol           | lisinopril     | amlodipin   | 0            | 0                | 0                   | 0                    | 0                  | 0             | 650mg                |
| 0          | 0           | metoPROLOL           | lisinopril     | 0           | 0            | 0                | 0                   | 0                    | 0                  | atorvastatin  | 0                    |
| 0          | 0           | carvedilol           | captopril      | 0           | 0            | 0                | 0                   | 0                    | 0                  | atorvastatin  | 0                    |
| 0          | 0           | Carvedilol           | 0              | Nifedipine  | 0            | 0                | tadalafil           | 0                    | 0                  | atorvastatin  | 0                    |
|            |             |                      |                |             |              |                  |                     |                      |                    |               |                      |
| unspecifie | 0           |                      | 0              | 0           | 0            | 0                | 0                   | 0                    | 0                  | 0             | 0                    |
| 0          | 0           |                      | 0              | lisinopril  | 0            | 0                | 0                   | 0                    | 0                  | 0             | 0                    |
| 0          | 0           |                      | 0              | losartan    | 0            | 0                | hydrochlorothiazide | 0                    | 0                  | 0             | 0                    |
| 0          | 0           |                      | 0              | 0           | amlodipin    | 0                | 0                   | sildenafil           | 0                  | 0             | 0                    |
| 0          | 1           |                      | 0              | 0           | 0            | 0                | 0                   | sildenafil           | 0                  | 0             | 0                    |

## Supplementary Table 2. Antibody list

| antibody       | Company                              | catalog number |
|----------------|--------------------------------------|----------------|
| p53            | Santa Cruz Biotechnology, Inc.       | sc-6243        |
| p16            | Santa Cruz Biotechnology, Inc.       | sc-1207        |
| p16            | Abcam                                | ab211542       |
| p21            | Abcam                                | ab188224       |
| CDK1/2         | Santa Cruz Biotechnology, Inc.       | sc-53219       |
| CDK4           | Santa Cruz Biotechnology, Inc.       | sc-23896       |
| $\gamma$ -H2AX |                                      | ZRB05636       |
| Mac-2          | Santa Cruz Biotechnology, Inc.       | sc-30157       |
| Arginase 1     | Santa Cruz Biotechnology, Inc.       | sc-20150       |
| IL-1b          | Santa Cruz Biotechnology, Inc.       | sc-7884        |
| CCN1           | R&D system                           | mab4864        |
| TNF-a          | Cell signaling Technology            | 3707           |
| Murf1          | Abcam                                | ab77577        |
| atrogin1       | Abcam                                | ab168372       |
| myostatin      | Abcam                                | ab71808        |
| p-AKT          | Cell signaling Technology            | 4060           |
| AKT            | Cell signaling Technology            | 4691           |
| Foxo3a         | Cell signaling Technology            | 2491           |
| Foxo1a         | Sigma-Aldrich                        | F2303          |
| KI67           | Millipore                            | AB9260         |
| Rb             | BD Pharmingen                        | 554136         |
| Pax7           | Developmental Studies Hybridoma Bank | Pax 7          |
| GAPDH          | Santa Cruz Biotechnology, Inc.       | SC-365062      |

### Supplementary Table 3. Primer list

| Name          | Sequence                          |
|---------------|-----------------------------------|
| IL-6          | Forward GGAGATGGATGTGCCAAACG      |
|               | Reverse CGAGCTCACTCTCTGTGGTGTT    |
| TNF $\alpha$  | Forward TGCTGATGGGAGGAGATGTCT     |
|               | Reverse TTTCTTTCAGGGACAGCCTGTT    |
| IL-1 $\beta$  | Forward AACACGGCAGTGGCTTTAAC      |
|               | Reverse GAGGAGAAGGCGTTTGCTTA      |
| IFN- $\gamma$ | Forward CCAGAGCGAAAGCATTTGCCAAGA  |
|               | Reverse TCGGCATCGTTTATGGTCGGA ACT |

Supplementary Table 4. The effect of D&Q treatments on body or muscle weights, BUN, creatinine, and grip strength

|                             | Sham        | CKD                        | CKD/Vehicle | CKD/D&Q                    |
|-----------------------------|-------------|----------------------------|-------------|----------------------------|
| B.W.(Initial)               | 24.7±1.4    | 25.2±1.1                   | 24.5±0.4    | 27.3±1.4                   |
| B.W. (harvest)              | 33.7±0.7    | 19.0±1.1 <sup>***</sup>    | 19.8±0.4    | 23.2±1.2                   |
| BUN (mM)                    | 9.5±1.1     | 33.6±6.0 <sup>**</sup>     | 36.8±0.9    | 21.9±4.7                   |
| Creatinine(mg/dL)           | 0.49±0.09   | 1.34±0.19 <sup>**</sup>    | 1.62±0.24   | 1.16±0.15                  |
| Gastrocnemius (mg)          | 189.7±7.9   | 111.0±7.1 <sup>***</sup>   | 106.2±4.9   | 137.3±6.6 <sup>#</sup>     |
| Soleus (mg)                 | 11.1±0.6    | 7.4±0.6 <sup>**</sup>      | 8.1±0.5     | 9.3±0.7                    |
| TA (mg)                     | 57.3±2.8    | 33.6±1.2 <sup>***</sup>    | 34.0±1.6    | 41.8±1.6 <sup>#</sup>      |
| EDL (mg)                    | 12.2±0.9    | 6.5±0.9 <sup>***</sup>     | 7.5±0.3     | 8.9±0.3                    |
| muscle grip strength (KGF2) | 0.139±0.002 | 0.065±0.005 <sup>***</sup> | 0.080±0.004 | 0.114±0.005 <sup>###</sup> |

B.W.: body weight; BUN: blood urea nitrogen; TA: Tibialis anterior muscle; EDL: Extensor digitorum longus muscle; \*: p < 0.05 compared with sham group; \*\*: p < 0.01 compared with sham group; \*\*\*: p < 0.001 compared with sham group; #: p < 0.05 compared with CKD + Vehicle group; ###: p < 0.001 compared with CKD + Vehicle group by one-way ANOVA.
